# Supplementary material for: Extrapulmonary Aspergillus infection in patients with CARD9 deficiency
Source: JCI journal article supplement (doi:10.1172/jci.insight.89890), 2016-10-19
Supplement: sd1 [file 1]

## List of Supplemental Material

1. Supplemental Table 1. Amplification and sequencing primers used for the identification of the c.3G>C *CARD9* (Caspase Recruitment Domain Family Member 9) mutation in Patient 2.
2. Supplemental Figure 1. Biallelic *CARD9* (Caspase Recruitment Domain Family Member 9) mutations in the patients with extrapulmonary aspergillosis.
3. Supplemental Figure 2. *CARD9* (Caspase Recruitment Domain Family Member 9) deficiency does not impair the ability of neutrophils to prevent *Aspergillus* conidial germination into hyphae.
4. Supplemental Figure 3. *CARD9* (Caspase Recruitment Domain Family Member 9) deficiency does not impair neutrophil-mediated oxidative cytotoxicity against *Aspergillus fumigatus*.
5. Supplemental Figure 4. The c.883C>T *CARD9* (Caspase Recruitment Domain Family Member 9) loss-of-function mutation is associated with impaired neutrophil accumulation in the infected tissue.
6. Supplemental Figure 5. *CARD9* (Caspase Recruitment Domain Family Member 9) deficiency does not impair neutrophil chemotaxis.

## SUPPLEMENTAL TABLES

**Supplemental Table 1. Amplification and sequencing primers used for the identification of the c.3G>C *CARD9* (Caspase Recruitment Domain Family Member 9) mutation in Patient 2.**

| Amplification primers     | Primer sequence                     | Annealing temperature | Product size |
|---------------------------|-------------------------------------|-----------------------|--------------|
| x1-2amp 662F              | CTGAGATGCTGGCGAGGGCGAGGGTGTTCG      | 68.5                  | 2677         |
| x1-2amp 3338R             | CGGGCCGGCTCCTTGCCCTGTGACCTTCTTGTA   |                       |              |
| x3-7amp 2806F             | GCCCCAGGCCCAACCCCAACCAC             | 67.5                  | 2303         |
| x3-7amp 5108R             | GCCGGAGGATTGCTTGAGGCCAGTAGTTTGA     |                       |              |
| x8-10amp 6616F            | ACCGGGGTGCAGGCTTGGGAGGAGAC          | 67.8                  | 1704         |
| x8-10amp 8319R            | TCGCCCCATCTTCTAGCTTCATGCACCTGGTCGTT |                       |              |
| x11-13amp 9249F           | CTGGCATCTGGCGCCTCCTGGAGCAATGA       | 68.5                  | 1741         |
| x11-13amp 10989R          | CGCGCAGCGCAGTCCGCAGCATCC            |                       |              |
| <b>Sequencing primers</b> | <b>Primer sequence</b>              |                       |              |
| x1seq 931F                | GGGGCCTCCTGGGCTGGGCGAATCAGAA        |                       |              |
| x1seq 1322R               | AAATGAACACATCTCCGCCAGGGGCCGTGAAAG   |                       |              |
| x2seq 2410F               | TGGGGGATCCAGCGTGGGGATGGGACATG       |                       |              |
| x3seq 3507R               | CGTGTTCCCCGGTGGCCCAGCTCCATCA        |                       |              |
| x4seq 3492F               | GCCACCGGGGAACACGGCACCATCTGACAC      |                       |              |
| x5-6seq 3999F             | AGCCTCATGAAGGCCGAGGACGACTGCAAGGTG   |                       |              |
| x5-6seq 4309R             | AGCGCCTGCCGCCAGTCCTCCTCCAGTACCT     |                       |              |
| x7seq 5108R               | GCCGGAGGATTGCTTGAGGCCAGTAGTTTGAG    |                       |              |
| x8seq 7305R               | AGGCCCCCTCCATGCCCAACAACCTGCTAGG     |                       |              |
| x9seq 7384F               | CTGCCCTCACAGCCCACCCACCCATTTTCTATGA  |                       |              |
| x10seq 7969R              | CATTGCGGCACGGGCTGCCTGTGCTGAA        |                       |              |
| x11-13seq 9388F           | CGGGGAGGGGTGGGGCAGCCGTGCTATA        |                       |              |
| x11-13seq 10735R          | GAGCGGGAATGCGGGTCACCCGTGCTGTTATTTA  |                       |              |

## SUPPLEMENTAL FIGURES

### A Sequencing

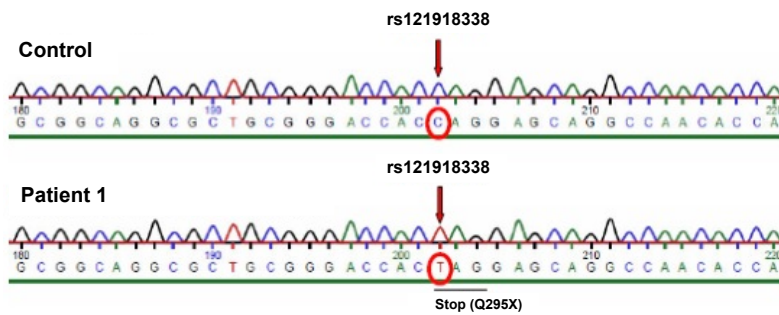

### B RFLP (Patient 1)

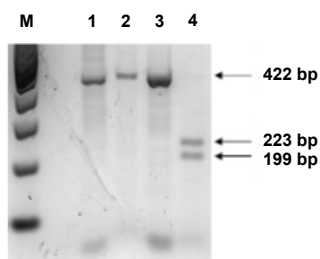

### C

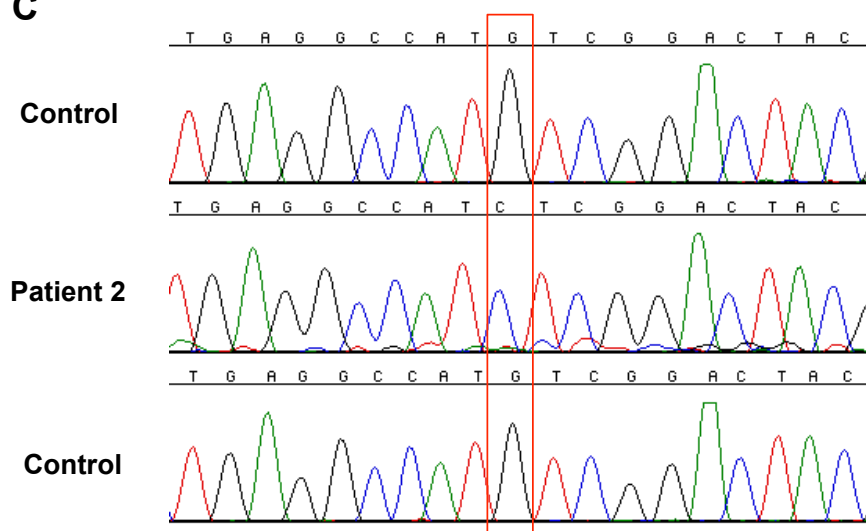

**Supplemental Figure 1. Biallelic *CARD9* (Caspase Recruitment Domain Family**

**Member 9) mutations in the patients with extrapulmonary aspergillosis. (A) Sequencing**

chromatogram of a healthy WT/WT individual (upper panel) and of Patient 1 (lower panel)

showing homozygous c.883C>T *CARD9* mutation (rs121918338). (B) The *CARD9* stop codon polymorphism (rs121918338) of Patient 1 was confirmed by restriction-fragment length polymorphism (RFLP) analysis. (M) 100 bp marker, (1) undigested PCR product of a healthy WT/WT individual, (2) digested PCR product of a healthy WT/WT individual, (3) undigested PCR product of Patient 1, (4) digested PCR product of Patient 1. Digestion with BfaI (restriction site: CTAG). (C) Sequencing chromatogram of Patient 2 (middle panel) and two healthy WT/WT individuals (upper and lower panels) showing homozygous c.3G>C *CARD9* mutation.

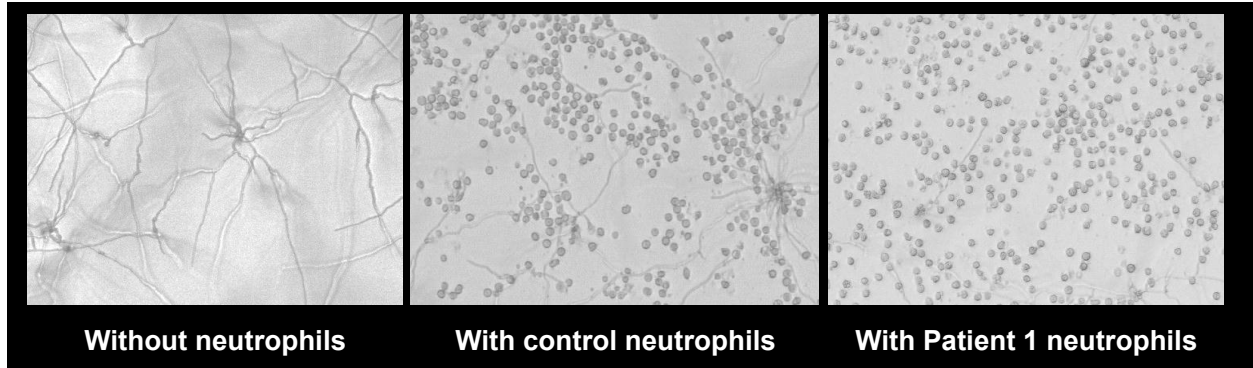

**Supplemental Figure 2. CARD9 (Caspase Recruitment Domain Family Member 9) deficiency does not impair the ability of neutrophils to prevent *Aspergillus* conidial germination into hyphae.** Representative images of *Aspergillus* hyphal germination 20 hours after *ex vivo* co-incubation of conidia with control neutrophils (middle panel), neutrophils from Patient 1 (right panel) or no exposure to neutrophils (left panel).

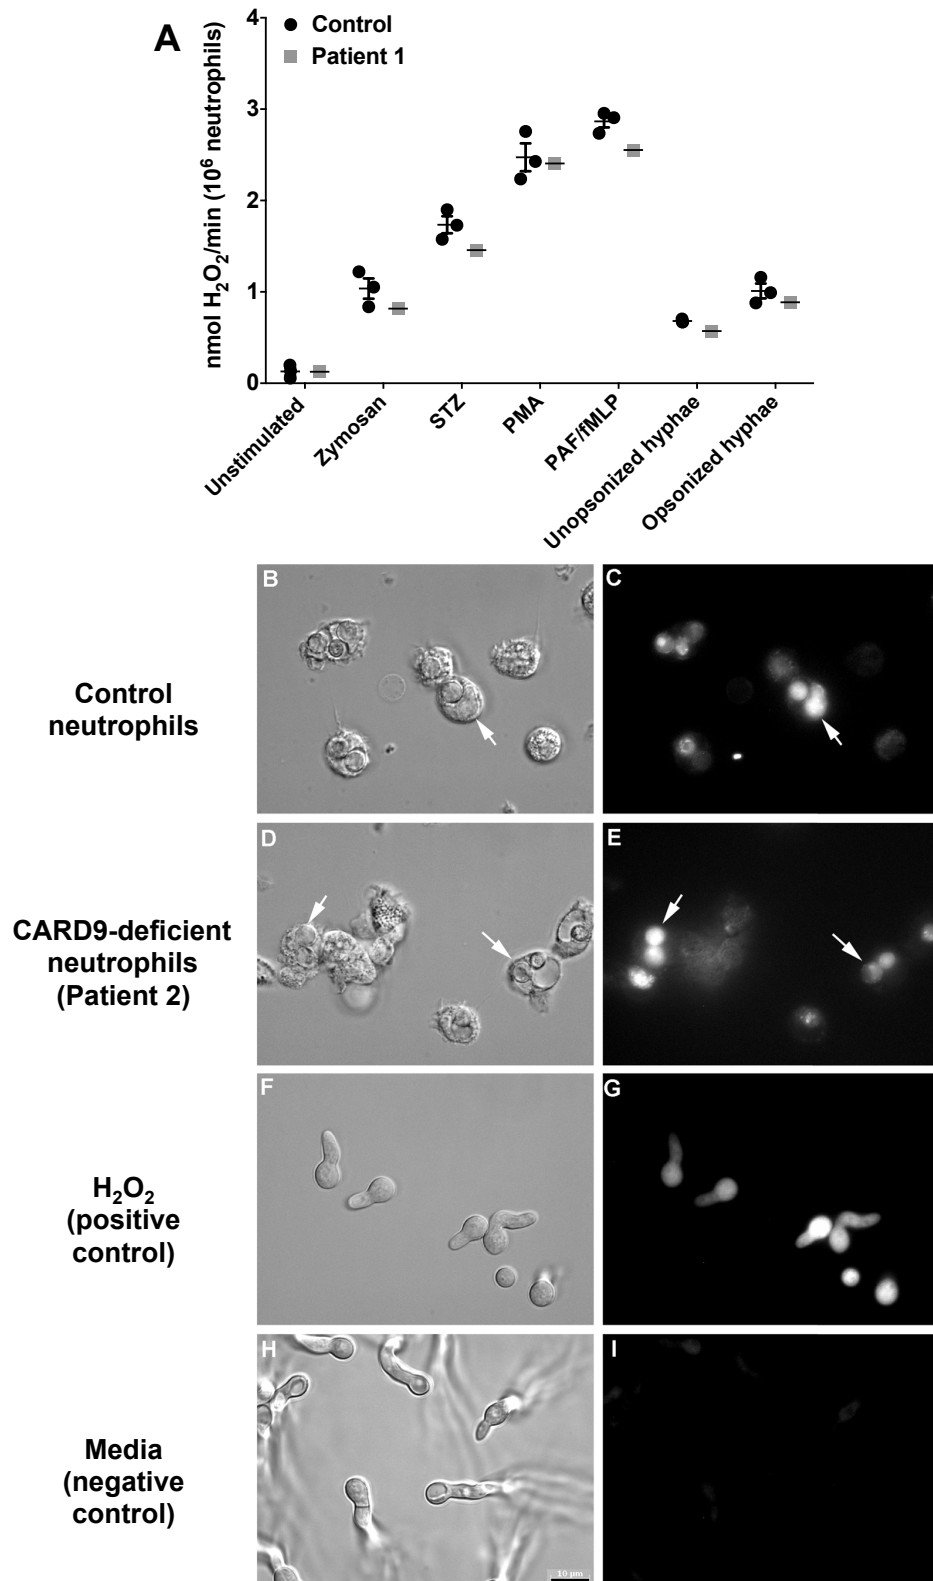

**Supplemental Figure 3. CARD9 (Caspase Recruitment Domain Family Member 9) deficiency does not impair neutrophil-mediated oxidative cytotoxicity against**

*Aspergillus fumigatus*. (A) Neutrophils from Patient 1 do not exhibit impaired release of hydrogen peroxide toward various fungal and non-fungal stimuli *ex vivo*, determined by the Amplex Red method (n = 3 healthy donors; n = 1 experiment with Patient 1 cells). STZ, serum-treated zymosan; PMA, phorbol-12-myristate-13-acetate; PAF, platelet-activating factor; fMLP, formyl-Met-Leu-Phe. (B-I) Neutrophils from healthy donors (B and C) and Patient 2 (D and E) induce similar degrees of GFP fluorescence in the *A. fumigatus* B-5233/GFP strain upon oxidative stress (white arrows). GFP-fluorescence is induced in the *A. fumigatus* B-5233/GFP strain by 375  $\mu$ M hydrogen peroxide (positive control; F and G) but not by R25 media alone (negative control; H and I). (B, D, F, and H), light microscopy. (C, E, G and I), fluorescence microscopy. All quantitative data represent mean  $\pm$  SEM.

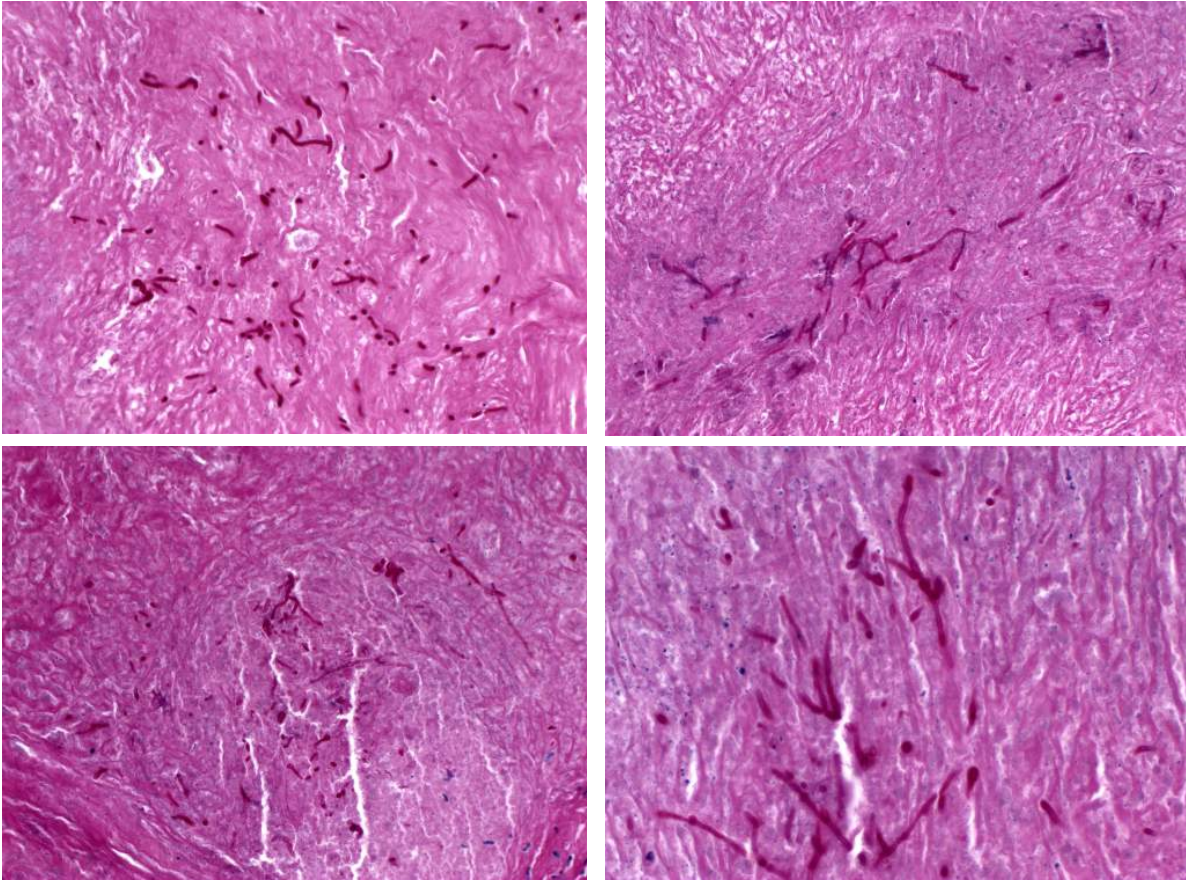

**Supplemental Figure 4. The c.883C>T *CARD9* (Caspase Recruitment Domain Family Member 9) loss-of-function mutation is associated with impaired neutrophil accumulation in the infected tissue.** Periodic acid–Schiff (PAS) stain of the mesenteric lymph node biopsy of Patient 1 shows necrotic tissue with invasion by branching hyphae, consistent with *Aspergillus* species. No neutrophil infiltration is seen. Magnification, 400× (upper left and lower right panels); 200× (upper right and lower left panels).

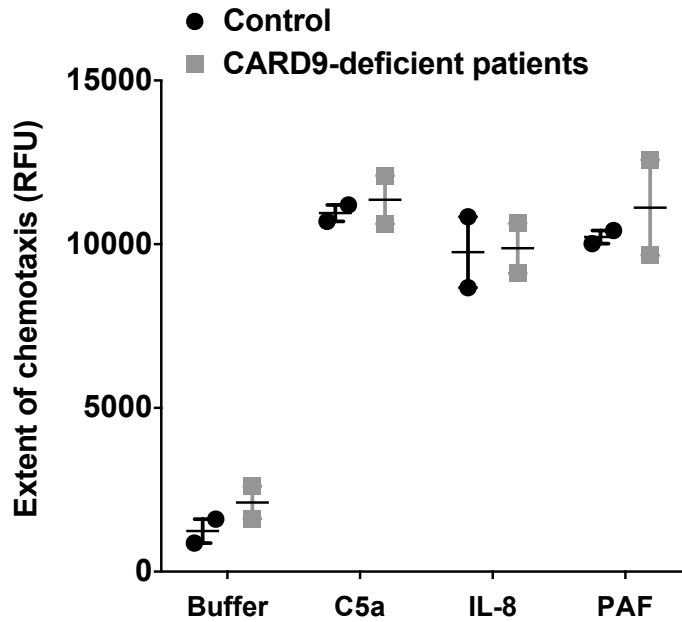

**Supplemental Figure 5. CARD9 (Caspase Recruitment Domain Family Member 9)**

**deficiency does not impair neutrophil chemotaxis.** Neutrophils from Patient 1 and another CARD9-deficient patient with the c.883C>T (p.Q295X) mutation do not exhibit impaired chemotaxis toward complement component C5a ( $10^{-8}$  M), IL-8 ( $10^{-8}$  M) or platelet-activating factor (PAF;  $10^{-7}$  M) *ex vivo*. Two healthy donors were used as controls on two independent experiments.
